# Supplementary material for: The effect of introducing an ether group into an imidazolium-based ionic liquid in binary mixtures with DMSO
Source: Royal Society of Chemistry journal article supplement (doi:10.1039/d0cp01568g), 2020-01-01
Supplement: d0cp01568g1.pdf [file d0cp01568g1.pdf]

*Supporting Information for*

The Effect of Introducing an Ether Group into an Imidazolium-based  
Ionic Liquid on the Binary Mixtures with DMSO.

Yu Zhou,<sup>a,c</sup> Xianzhen Xu,<sup>a</sup> Zonghua Wang<sup>a</sup>, Shida Gong,<sup>a</sup> Hong Chen,<sup>a</sup> Zhiwu Yu,<sup>b</sup>

Johannes Kiefer,<sup>c\*</sup>

*a Shandong Sino-Japanese Center for Collaborative Research of Carbon  
Nanomaterials, College of Chemistry and Chemical Engineering, Qingdao University,  
Qingdao 266071, China.*

*b MOE Key Laboratory of Bioorganic Phosphorous Chemistry and Chemical Biology,  
Tsinghua University, Beijing 100084, China.*

*c Engineering Thermodynamics, University of Bremen, Bremen, 28359, Germany.*

A submission to: *Phys. Chem. Chem. Phys.*

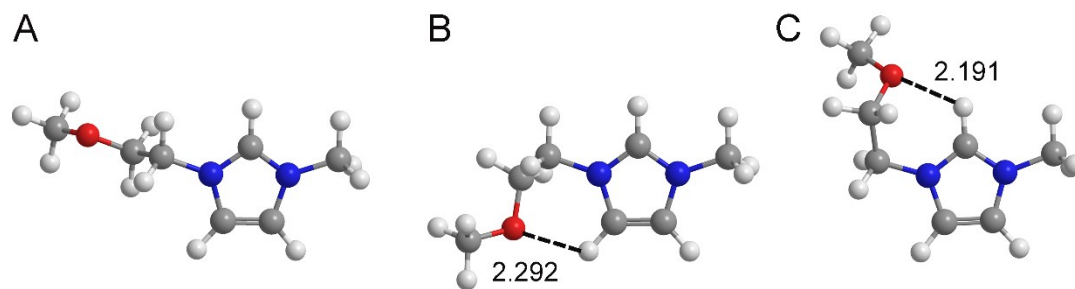

**Figure S1.** Optimized geometries for [EOMIM]<sup>+</sup>. Hydrogen bonds are denoted by dashed lines, and the corresponding distances of H···O are labeled.

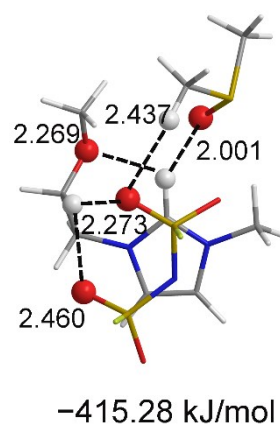

**Figure S2.** Optimized geometries for [EOMIM]<sup>+</sup>-[FSI]<sup>-</sup>-DMSO complex. The interaction energies are denoted below the structure. Hydrogen bonds are denoted by dashed lines, and the corresponding distances of H···O are labeled.

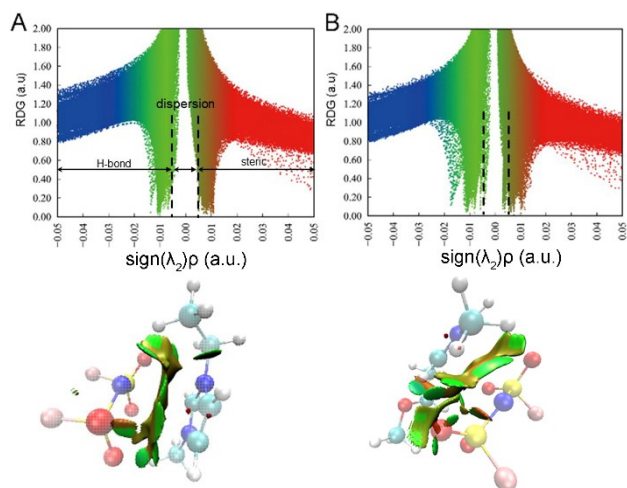

**Figure S3.** Plots of the reduced density gradient versus the electron density multiplied by the sign of the second Hessian eigenvalue for [EMIM]<sup>+</sup>[FSI]<sup>-</sup> (A) and [EOMIM]<sup>+</sup>[FSI]<sup>-</sup> (B) pairs.

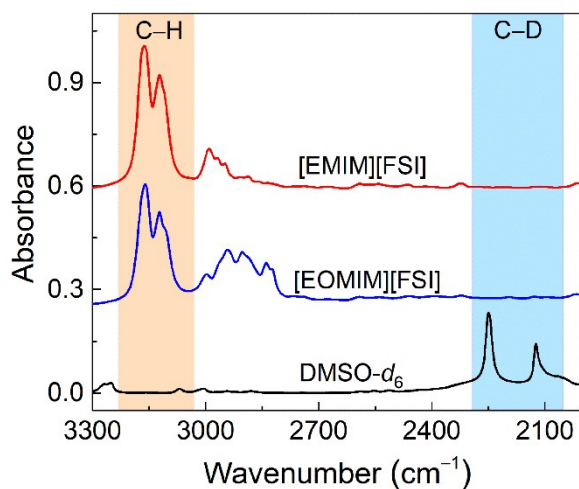

**Figure S4.** The infrared spectra of pure EMIMFSI, EOMIMFSI, and DMSO-*d*<sub>6</sub>. The color region are selected to analyze.

**Table S1.** The calculated frequencies of C2-H of the possible complexes in EOMIMFSI DMSO-*d*<sub>6</sub> system.

---

| EOMIMFSI-DMSO    |        |
|------------------|--------|
| cation           | 3108.3 |
| ion pair         | 3100.8 |
| ion cluster      | 3123.2 |
| cation-DMSO      | 2954.4 |
| ion pair-DMSO    | 3086.3 |
| ion cluster-DMSO | 3111.8 |

---
